# Supplementary material for: Areas of Concern and Support among the Austrian General Population: A Qualitative Content Analytic Mapping of the Shift between Winter 2020/21 and Spring 2022
Source: MDPI journal article supplement (doi:10.3390/healthcare11182539), 2023-09-14
Supplement: s1 [file s1]

**Table S1: Category System that Emerged from the Data of Question 1: “ What currently gives you the most cause for concern?”**

Table S1. Category System that Emerged from the Data of Question 1: “ What currently gives you the most cause for concern?”

| <b>Categories</b>                                     | <b><i>n</i></b> | <b>%</b>     |
|-------------------------------------------------------|-----------------|--------------|
| <b>Inflation/Finances</b>                             | <b>294</b>      | <b>30.4%</b> |
| Inflation                                             | 181             | 18.7%        |
| Finances                                              | 113             | 11.7%        |
| <b>War in Ukraine</b>                                 | <b>212</b>      | <b>21.9%</b> |
| <b>Mental health</b>                                  | <b>101</b>      | <b>10.5%</b> |
| Uncertainty/ Anxiety                                  | 30              | 3.1%         |
| Stress/ Overburden                                    | 21              | 2.2%         |
| Mental Health                                         | 14              | 1.4%         |
| People                                                | 11              | 1.1%         |
| Death of Relatives                                    | 8               | 0.8%         |
| The Weather                                           | 7               | 0.7%         |
| Loneliness                                            | 6               | 0.6%         |
| Life/Everything                                       | 4               | 0.4%         |
| <b>Physical health</b>                                | <b>101</b>      | <b>10.5%</b> |
| Physical Health                                       | 81              | 8.4%         |
| Disease in the Family                                 | 20              | 2.1%         |
| <b>Pandemic</b>                                       | <b>90</b>       | <b>9.3%</b>  |
| <b>Sociopolitical Development</b>                     | <b>88</b>       | <b>9.1%</b>  |
| Political and Social Developments                     | 38              | 3.9%         |
| Climate Change/ Environmental Problems                | 22              | 2.3%         |
| Situation in the World                                | 16              | 1.7%         |
| Media                                                 | 8               | 0.8%         |
| Refugees                                              | 4               | 0.4%         |
| <b>Family/Relationship and Interpersonal Problems</b> | <b>80</b>       | <b>8.3%</b>  |
| Self-Related                                          | 42              | 4.3%         |
| Relationship Problems                                 | 23              | 2.4%         |
| Family Problems                                       | 16              | 1.7%         |
| <b>Nothing</b>                                        | <b>64</b>       | <b>6.6%</b>  |
| No Burden                                             | 58              | 6.0%         |
| No Idea                                               | 6               | 0.6%         |
| <b>Work/Unemployment</b>                              | <b>64</b>       | <b>6.6%</b>  |
| <b>School/Education/Study</b>                         | <b>38</b>       | <b>3.9%</b>  |
| <b>Restrictions</b>                                   | <b>34</b>       | <b>3.5%</b>  |

**Table S2: Category System that Emerged from the Data of Question 2: “What currently provides you with the most support?”**

Table S2. Category System that Emerged from the Date of Question 2: “What currently provides you with the most support?”

| <b>Categories</b>                | <b><i>n</i></b> | <b>%</b>     |
|----------------------------------|-----------------|--------------|
| <b>Social Contacts</b>           | <b>345</b>      | <b>36.2%</b> |
| Family Support                   | 145             | 15.2%        |
| Friends/Colleagues/Classmates    | 82              | 8.6%         |
| Conversation with Family/Friends | 55              | 5.8%         |
| Partner                          | 39              | 4.1%         |
| My Children/Grandchildren        | 16              | 1.7%         |
| Time with Family/Friends         | 8               | 0.8%         |
| <b>Recreational Activities</b>   | <b>218</b>      | <b>22.9%</b> |
| Leisure Activities               | 63              | 6.6%         |
| Walking/Nature                   | 51              | 5.4%         |
| Sports                           | 38              | 4.0%         |
| Silence and Relaxation           | 32              | 3.4%         |
| Music                            | 16              | 1.7%         |
| Hobbies                          | 13              | 1.4%         |
| Reading                          | 5               | 0.5%         |
| <b>Attitude and Abilities</b>    | <b>209</b>      | <b>21.9%</b> |
| Personal Attitude                | 68              | 7.1%         |
| Positive Attitude                | 41              | 4.3%         |
| Myself                           | 29              | 3.0%         |
| Faith                            | 23              | 2.4%         |
| Mental Skills                    | 14              | 1.5%         |
| Planning/Structuring             | 12              | 1.3%         |
| Meditation                       | 9               | 0.9%         |
| Problem Solving                  | 7               | 0.7%         |
| Show Emotions                    | 6               | 0.6%         |
| <b>Nothing</b>                   | <b>109</b>      | <b>11.4%</b> |
| Nothing                          | 90              | 9.4%         |
| Nobody/no Help                   | 19              | 2.0%         |
| <b>Distraction</b>               | <b>85</b>       | <b>8.9%</b>  |
| Distraction                      | 35              | 3.7%         |
| Social Media                     | 15              | 1.6%         |
| Sleep                            | 14              | 1.5%         |
| Alcohol/Cigarettes               | 8               | 0.8%         |
| Drugs                            | 8               | 0.8%         |
| Retreat                          | 5               | 0.5%         |
| <b>Work/Save Money</b>           | <b>84</b>       | <b>8.8%</b>  |
| Work                             | 39              | 4.1%         |
| Save Money                       | 33              | 3.5%         |
| Money                            | 12              | 1.3%         |
| <b>Professional Help</b>         | <b>42</b>       | <b>4.4%</b>  |

|                             |           |             |
|-----------------------------|-----------|-------------|
| Psychotherapy               | 21        | 2.2%        |
| Medical Treatment           | 12        | 1.3%        |
| Medication                  | 9         | 0.9%        |
| <b>Media and News</b>       | <b>32</b> | <b>3.4%</b> |
| Reduce News                 | 22        | 2.3%        |
| News                        | 10        | 1.0%        |
| <b>I do not know</b>        | <b>27</b> | <b>2.8%</b> |
| No Problem                  | 16        | 1.7%        |
| No Idea                     | 11        | 1.2%        |
| <b>Displacement</b>         | <b>19</b> | <b>2.0%</b> |
| <b>Pets</b>                 | <b>11</b> | <b>1.2%</b> |
| <b>School and Education</b> | <b>9</b>  | <b>0.9%</b> |
| <b>Others</b>               | <b>9</b>  | <b>0.9%</b> |

---
